# Supplementary material for: An endoplasmic reticulum-targeted fluorescent probe for ratiometric tracking of endogenous SO2 derivatives
Source: Royal Society of Chemistry journal article supplement (doi:10.1039/d3nj04985j), 2024-01-01
Supplement: d3nj04985j1.pdf [file d3nj04985j1.pdf]

## Supplementary Information for

### An endoplasmic reticulum-targeted fluorescence probe for ratiometric tracking of endogenous SO<sub>2</sub> derivatives

Yehao Yan<sup>a</sup>, Weilei Gong<sup>a</sup>, Ruiji Li<sup>d</sup>, Jiannan Sun<sup>a</sup>, Hua Wang<sup>a</sup>, Xiaoying He<sup>\*b</sup>, Yanmei Si<sup>\*c</sup>

<sup>a</sup>School of Public Health, Jining Medical University, Jining, Shandong, 272067, PR China.

<sup>b</sup>Department of Nephrology, Shanxi Provincial People's Hospital, Taiyuan, PR China.

<sup>c</sup>School of Forensic Medicine and Laboratory Medicine, Jining Medical University, Jining, 272067, PR China.

<sup>d</sup>School of Pharmacy, Jining Medical University, Shandong, 276826, PR China.

\*Corresponding authors: E-mail: amjingying@163.com; siyanmei90@126.com

#### Table of Content

Fig. S1-3 The spectra of <sup>1</sup>H NMR, MS and <sup>13</sup>C NMR of JSS-1.

Fig. S4 The energy overlap of donor and acceptor.

Fig. S5 The energy transfer efficiency.

Fig. S6 The optical properties of the probe JSS-1 in different solvents.

Fig. S7 light stability of the probe JSS-1 in vitro.

Fig. S8 <sup>1</sup>H NMR of the addition product.

Fig. S9 HR-MS of the addition product.

Fig. S10 The response time of JSS-1 toward HSO<sub>3</sub><sup>-</sup>/SO<sub>3</sub><sup>2-</sup>.

Fig. S11 Fluorescence spectra (I<sub>535</sub>/I<sub>635</sub>) of probe JSS-1 toward HSO<sub>3</sub><sup>-</sup>/SO<sub>3</sub><sup>2-</sup> in different pH condition.

Fig. S12 The viability of JSS-1 in HeLa cells.

Fig. S13 The photo-stability of JSS-1 in living cells.

Table S1 The comparison of probe JSS-1 toward other detection works about HSO<sub>3</sub><sup>-</sup>/SO<sub>3</sub><sup>2-</sup>.

## 1. Detection limit

$$\text{Detection limit} = 3\sigma / s$$

$\sigma$  represents the standard deviation of the detection of 10 probe solutions without the addition of  $\text{HSO}_3^-/\text{SO}_3^{2-}$ .  $s$  represents the slope of titration linear relationship.

## 2. Energy transfer efficiency

$$\eta = 1 - F_{(\text{donor in FRET system})} / F_{(\text{donor})}$$

In the equation,  $\eta$  represents the energy transfer efficiency in FRET system.  $F_{(\text{donor in FRET system})}$  represents fluorescent intensity of the donor in probe JSS-1 (FRET system).

$F_{(\text{donor})}$  represents fluorescent intensity of the donor without any energy transferred.

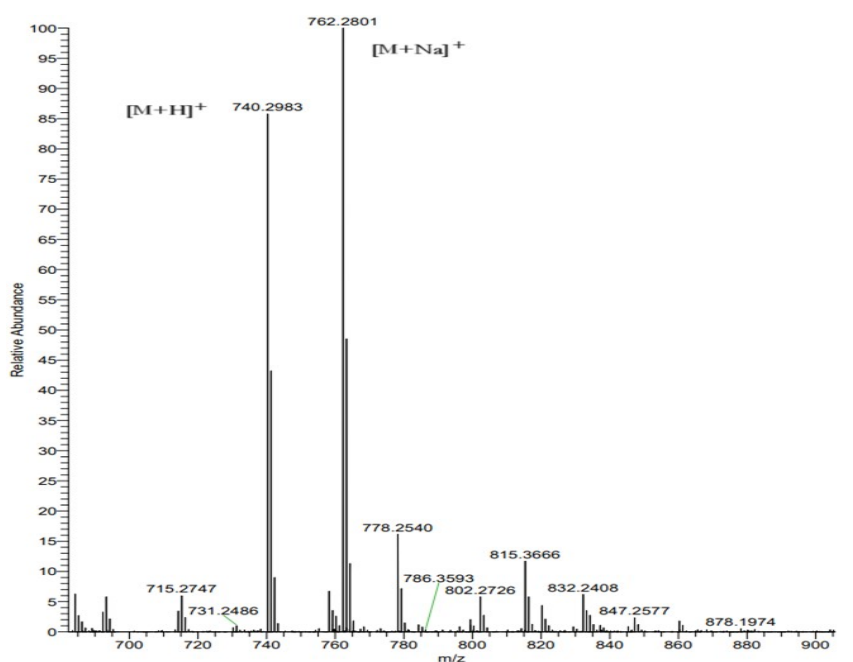

Fig. S1 The HRMS spectra of JSS-1.

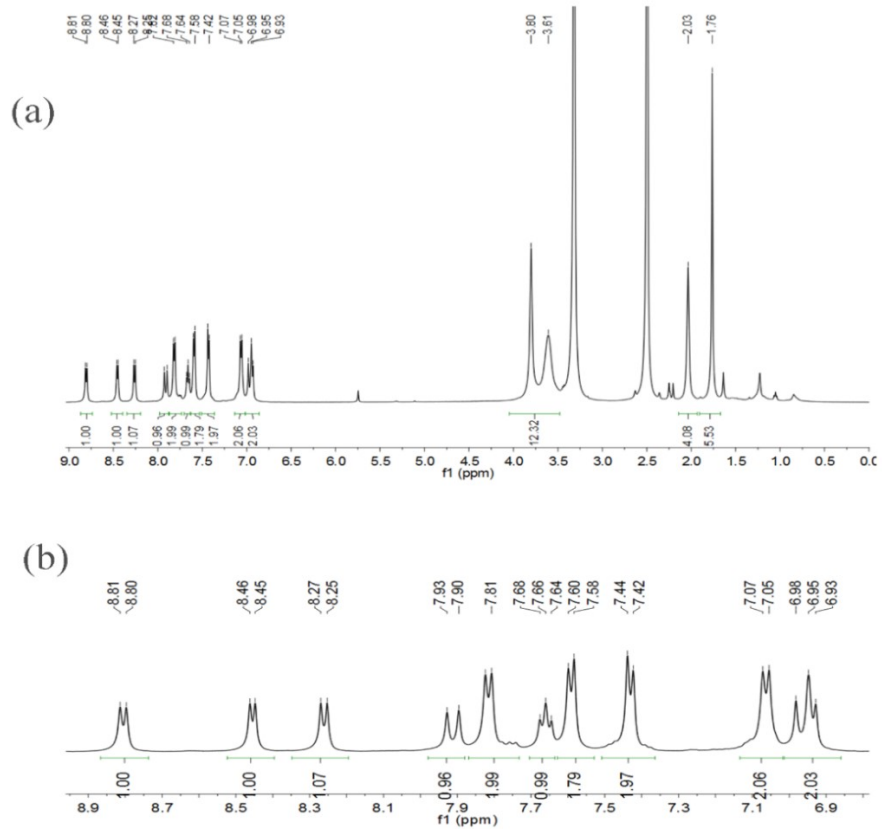

Fig. S2 The  $^1\text{H}$  NMR spectra of JSS-1.

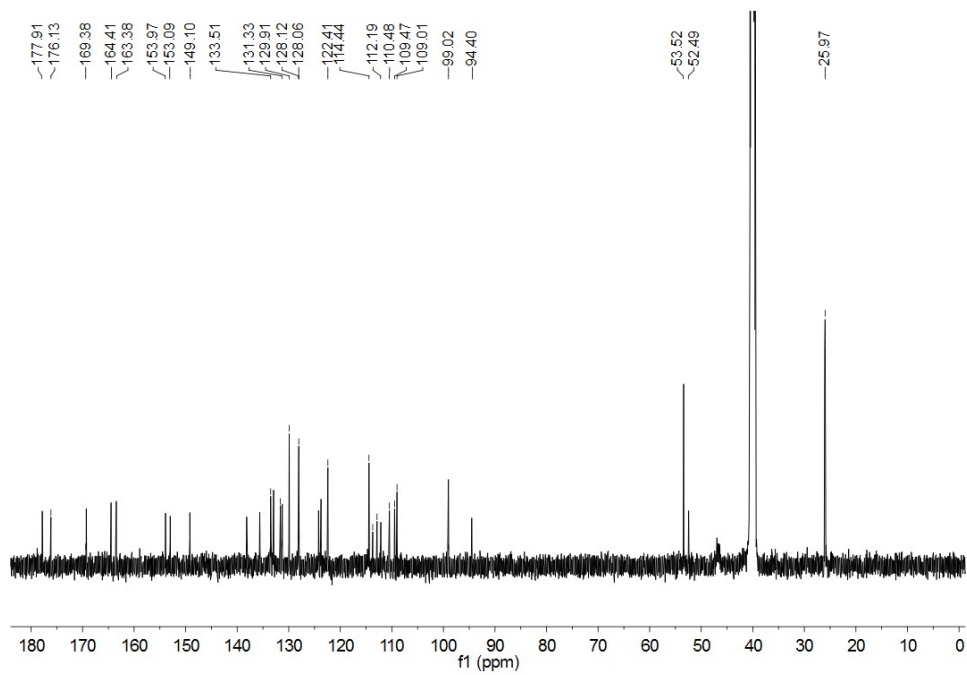

Fig. S3 The  $^{13}\text{C}$  NMR spectra of JSS-1.

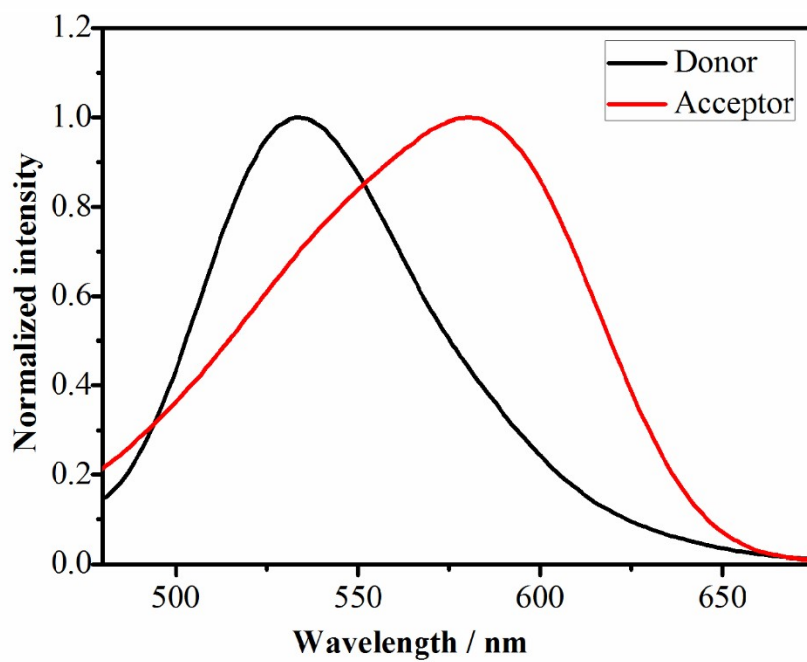

Fig. S4 The energy overlap of donor and acceptor.

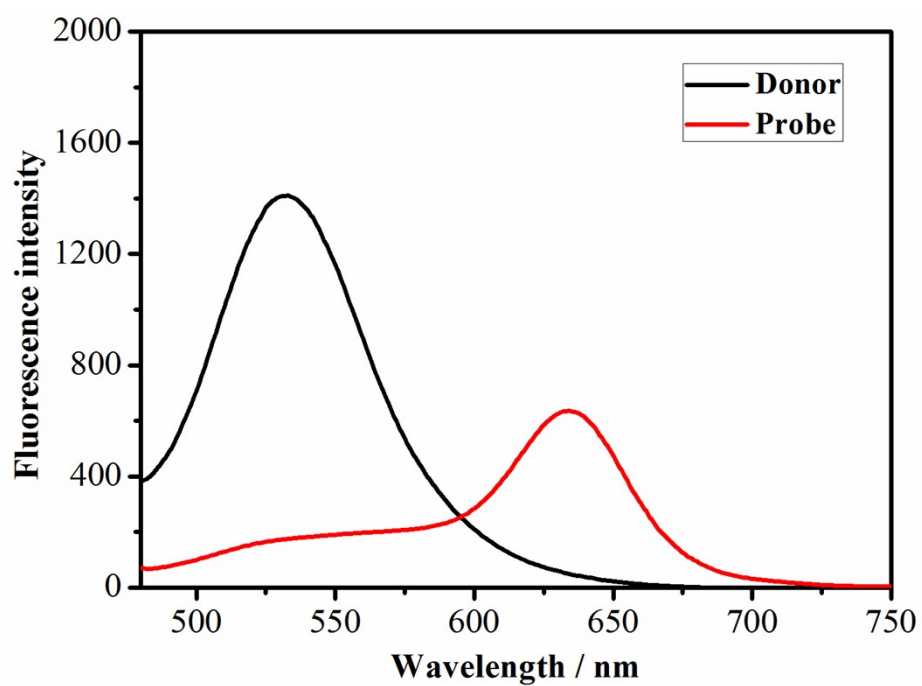

Fig. S5 The energy transfer efficiency.

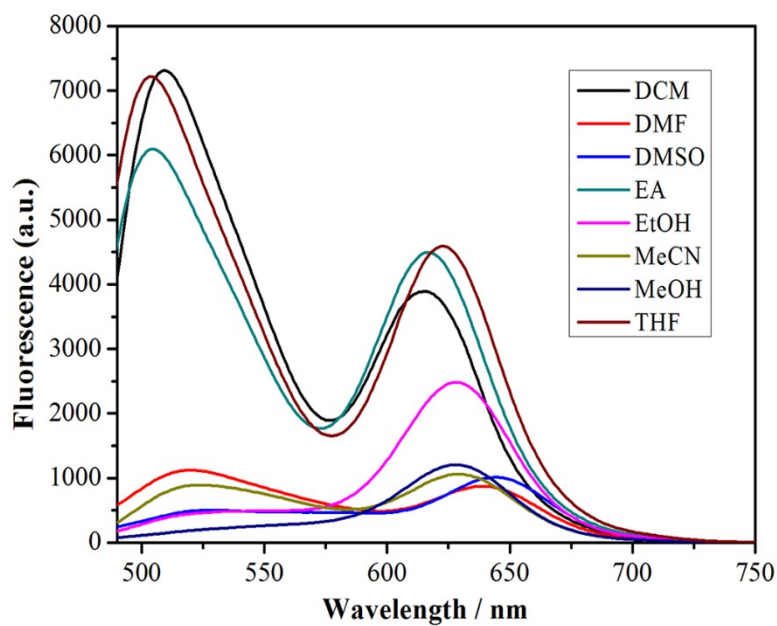

Fig. S6 The optical properties of the probe JSS-1 in different solvents.

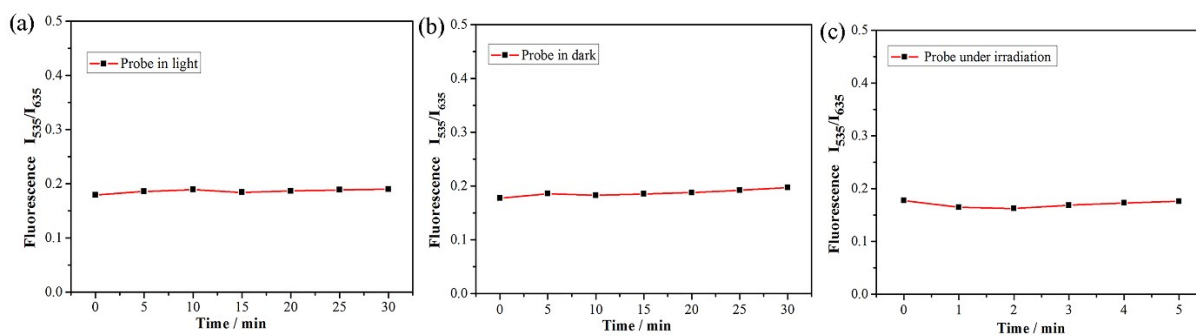

Fig. S7 light stability of the probe JSS-1 in vitro. (a) the fluorescence ratio ( $I_{535}/I_{635}$ ) of probe JSS-1 under light

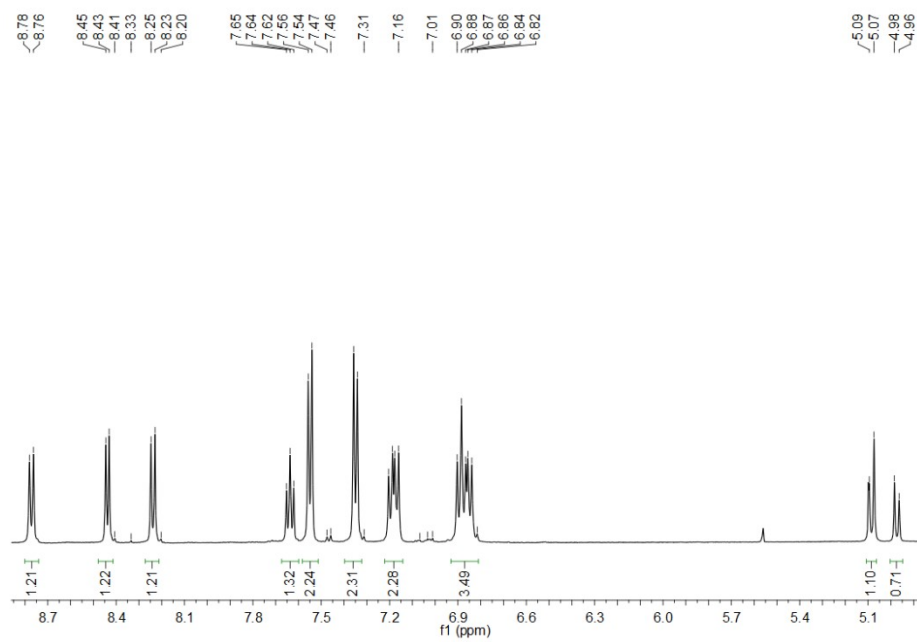

Fig. S8  $^1\text{H}$  NMR of the addition product.

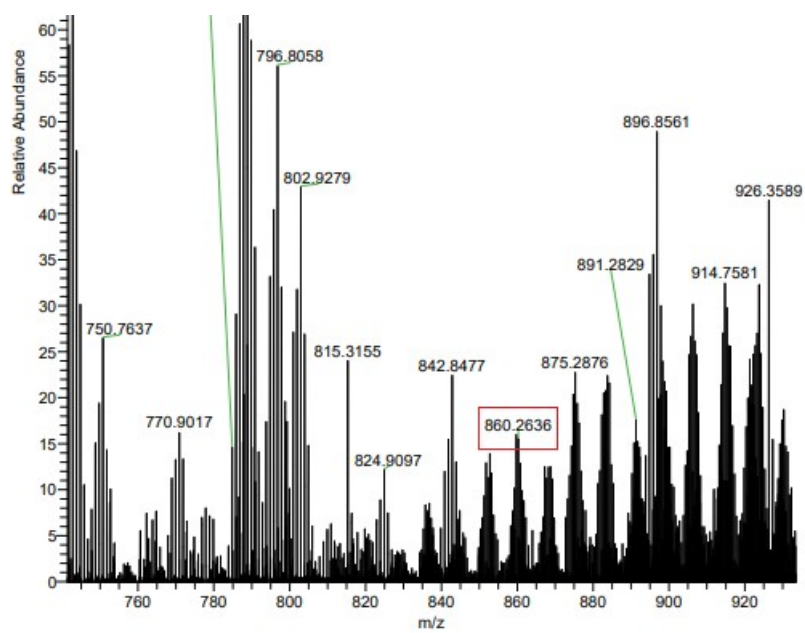

Fig. S9 HR-MS of the addition product.

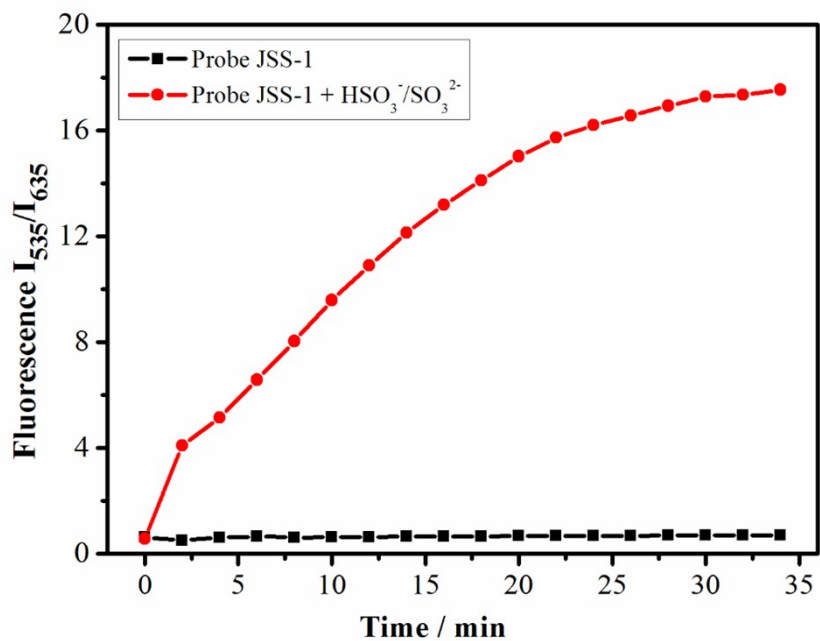

Fig. S10 The response time of JSS-1 toward HSO<sub>3</sub><sup>-</sup>/SO<sub>3</sub><sup>2-</sup>.

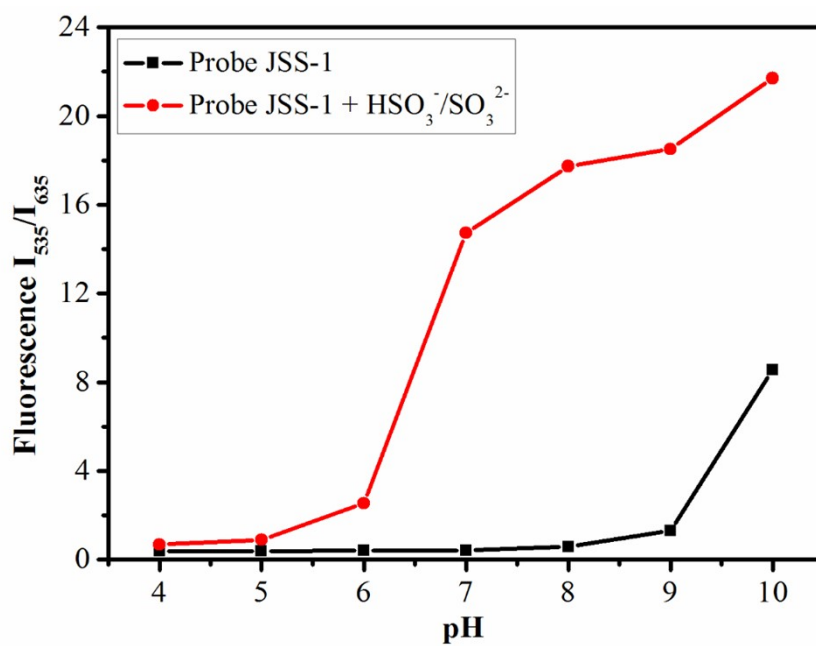

Fig. S11 Fluorescence spectra ( $I_{535}/I_{635}$ ) of probe JSS-1 toward HSO<sub>3</sub><sup>-</sup>/SO<sub>3</sub><sup>2-</sup> in different pH condition.

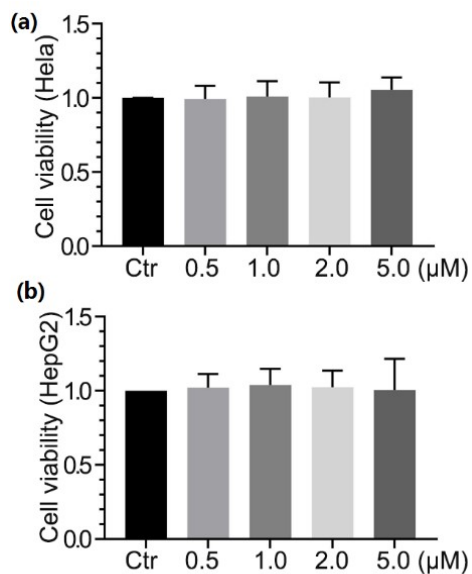

Fig. S12 The viability of JSS-1 in HeLa cells.

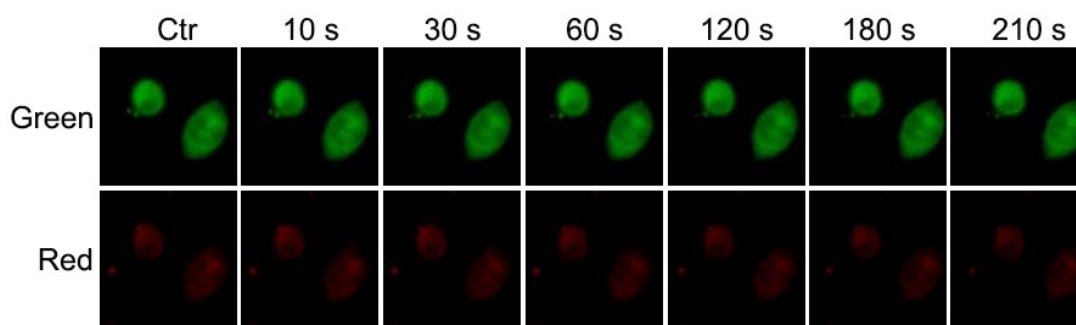

Fig. S13 The photo-stability of JSS-1 in living cells.

Table S1 The comparison of probe JSS-1 toward other detection works about  $\text{HSO}_3^-$  /  $\text{SO}_3^{2-}$ .

|   | Probe structure | Organelle targeting  | Stokes Shift | Ratiometric | Detection limit | Ref. |
|---|-----------------|----------------------|--------------|-------------|-----------------|------|
| 1 |                 | no obvious targeting | 260 nm       | Yes         | 0.10 μM         | S1   |
| 2 |                 | lysosome             | 215 nm       | Yes         | 72.00 nM        | S2   |



|   |                                                                                    |                       |        |     |                     |           |
|---|------------------------------------------------------------------------------------|-----------------------|--------|-----|---------------------|-----------|
| 3 | 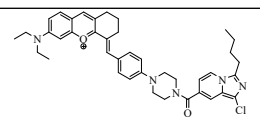  | mitochondria          | 460 nm | Yes | 0.98 $\mu\text{M}$  | S3        |
| 4 |   | mitochondria          | 100 nm | no  | 0.17 $\mu\text{M}$  | S4        |
| 5 |   | mitochondria          | 65 nm  | Yes | 0.17 $\mu\text{M}$  | S5        |
| 6 |   | mitochondria          | 202 nm | no  | 1.57 $\mu\text{M}$  | S6        |
| 7 |   | mitochondria          | 170 nm | Yes | 10.20 $\mu\text{M}$ | S7        |
| 8 |  | endoplasmic reticulum | 235 nm | Yes | 86.77 nM            | This work |

## Reference

[S1] F.T. Liu, N. Li, Y.S. Chen, H.Y. Yu, J.Y. Miao and B.X. Zhao, *Anal. Chim. Acta*, **2022**, 1211, 339908.

[S2] F. Li, B.Z. Zhou, W. Yao, S.K. Sun, J.Y. Miao, B.X. Zhao and Z.M. Lin, *Anal. Chim. Acta*, **2023**, 1239, 340721.

[S3] R. Cui, C. Liu, P. Zhang, K. Qin and Y. Ge, *Molecules*, **2023**, 28, 515.

[S4] J. Chao, Z. Wang, Y. Zhang, F. Huo and C. Yin, *Anal. Methods*, **2021**, 13, 3535-3542.

- [S5] P. Huang, F. Huo and C. Yin, *Analyst*, **2022**, 147, 5663-5669.
- [S6] Q. Yan, X. Yao, Y. Li, K. Zhong, L. Tang, X. Yan, *Spectrochim. Acta, Part A*, **2023**, 299, 122882.
- [S7] Y. Du, C. Pan, C. Cao, *Spectrochim. Acta, Part A*, **2023**, 290, 122275.
